# Supplementary material for: Acid-triggered size reduction of nanomedicines for enhancing tumor therapy efficacy
Source: Royal Society of Chemistry journal article supplement (doi:10.1039/d4bm01121j), 2024-12-04
Supplement: d4bm01121j1.pdf [file d4bm01121j1.pdf]

## Supporting Information

### **Acid-triggered size reduction of nanomedicines for enhancing tumor therapy efficacy**

*Chongzhi Wang, YiKai Tang, Cheng Li, Wei Wu\* and Xiqun Jiang\**

Department of Polymer Science & Engineering, College of Chemistry & Chemical Engineering, and Jiangsu Key Laboratory for Nanotechnology, Nanjing University, Nanjing, 210023, P.R. China.

\* To whom correspondence should be addressed: [jiangx@nju.edu.cn](mailto:jiangx@nju.edu.cn);

[wuwei@nju.edu.cn](mailto:wuwei@nju.edu.cn).

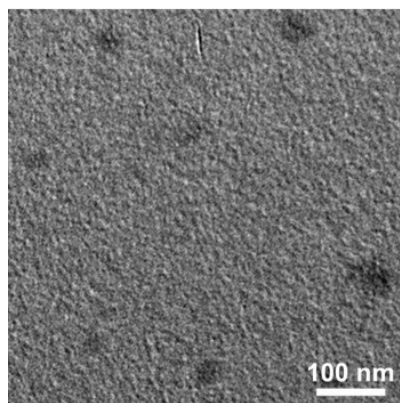

**Figure S1.** TEM image of UCD at pH 7.4.

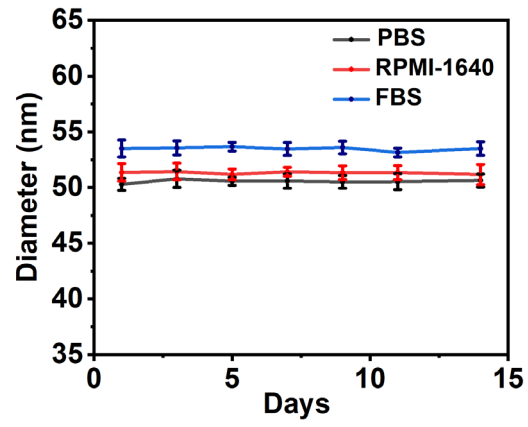

**Figure S2.** Size evolution of PCD in different media measured by DLS.

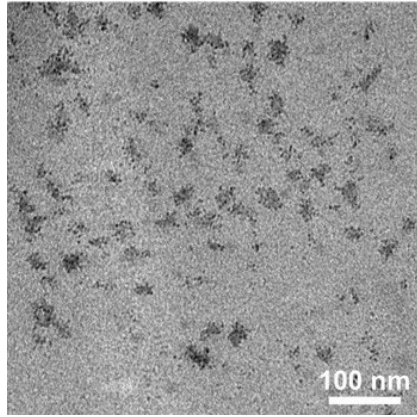

**Figure S3.** TEM image of PCD after incubation at pH 6.5 for 12 h.

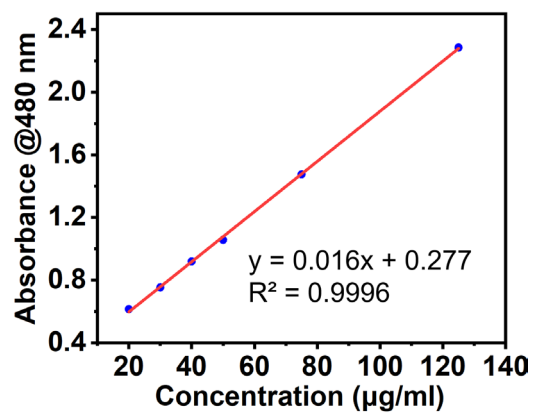

**Figure S4.** The 480 nm absorbance of DOX at different concentrations.

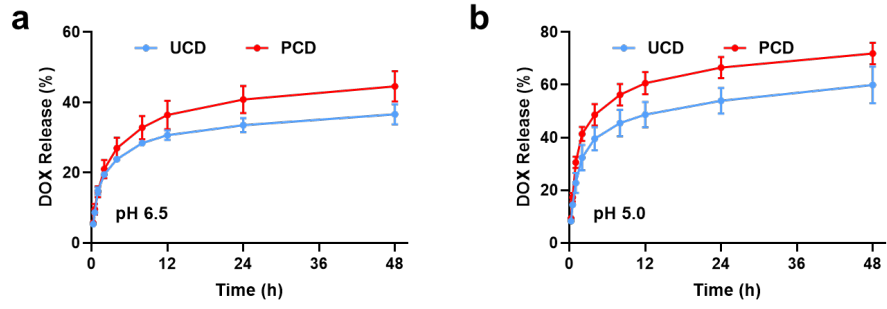

**Figure S5.** DOX release profiles of UCD and PCD at pH 6.5 (a), and 5.0 (b) (n=3, mean  $\pm$  SD).

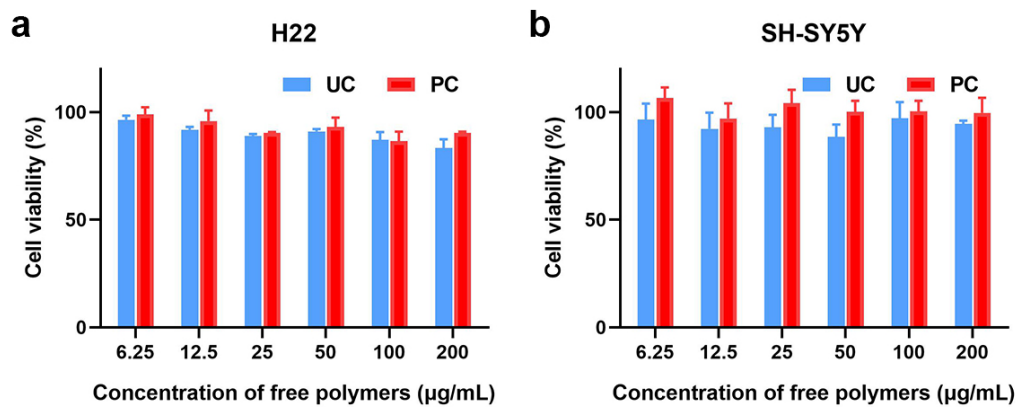

**Figure S6.** Cytotoxicity of PC and UC against H22 and SH-SY5Y cells.

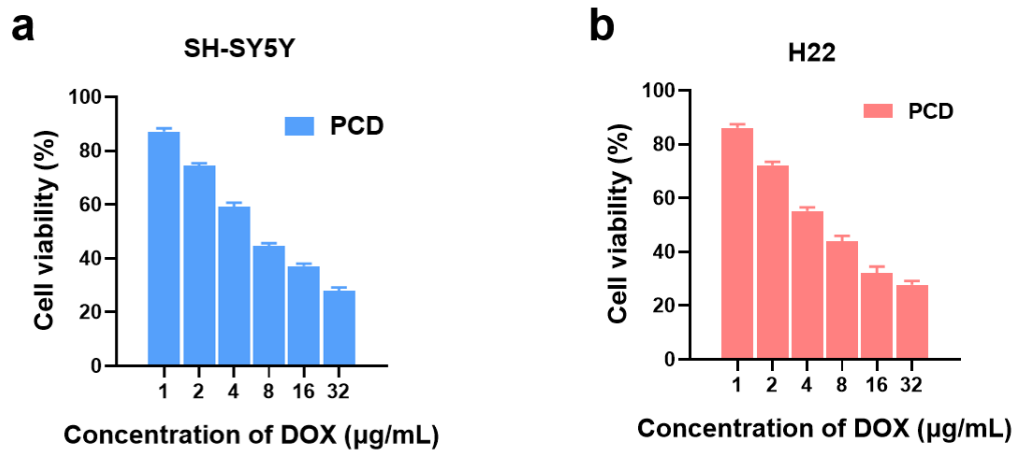

**Figure S7.** Cytotoxicity of PCD against SH-SY5Y (a) and H22 (b) cells at pH 6.5.



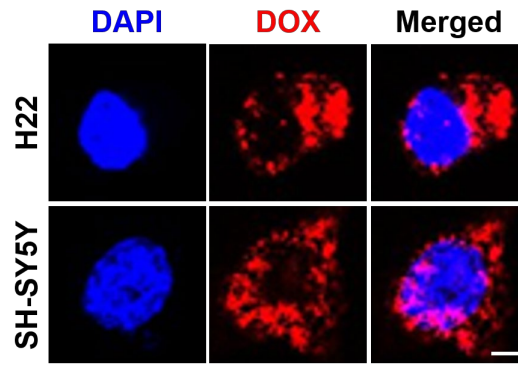

**Figure S8.** Enlarged views of the CLSM images in Figure 4d, f, scale bar = 4  $\mu\text{m}$ .

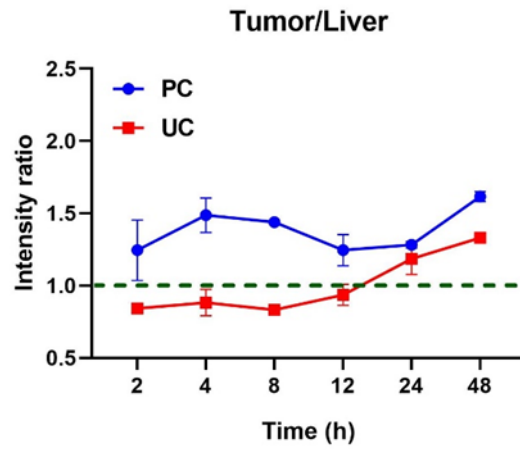

**Figure S9.** MFI ratio of tumor to liver at different time points after tail-vein injection of the NIR797-labeled UC and PC in H22 tumor-bearing mice (n=3, mean  $\pm$  SD).

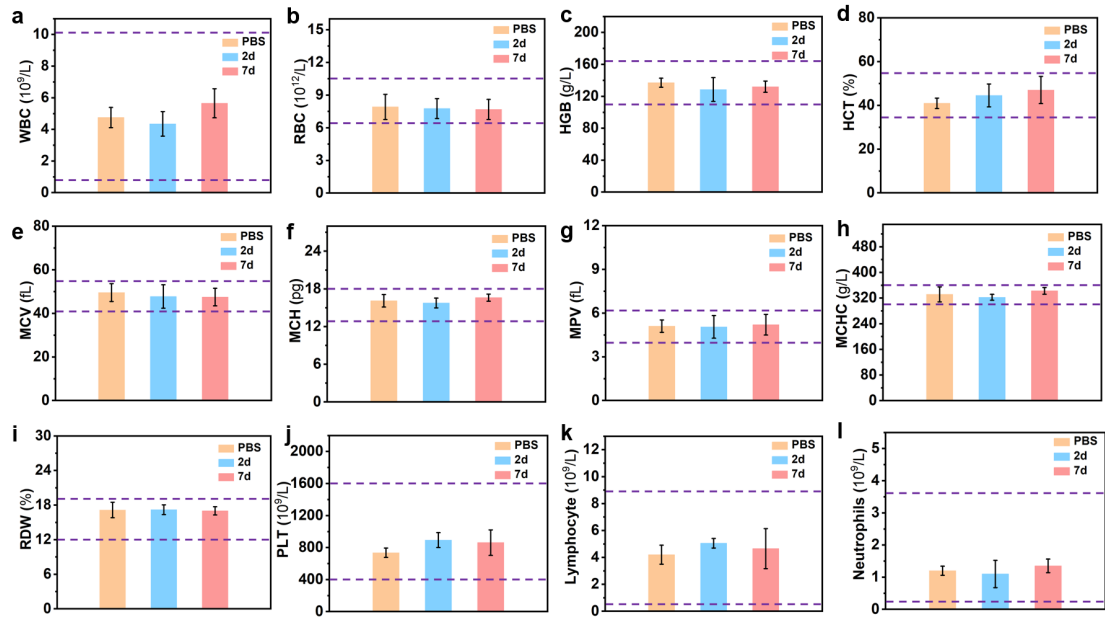

Figure S10. Blood routine indicators of the mice on the 2nd and 7th days after tail-vein injection of PCD (n=2, mean  $\pm$  SD).

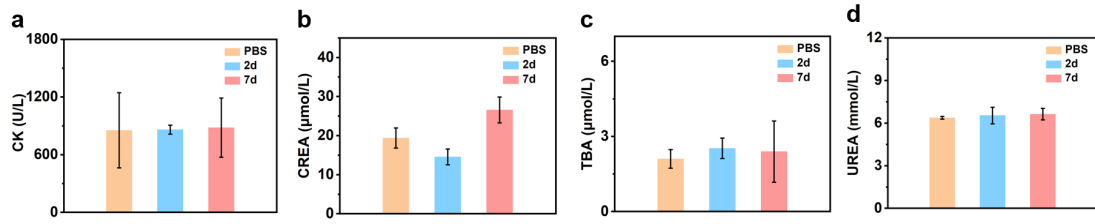

**Figure S11.** Serum biochemical indicators of the mice on the 2nd and 7th days after tail-vein injection of PCD (n=2, mean  $\pm$  SD).
